# Supplementary material for: Design and construction of bi-metal MOF-derived yolk–shell Ni2P/ZnP2 hollow microspheres for efficient electrocatalytic oxygen evolution
Source: Royal Society of Chemistry journal article supplement (doi:10.1039/d0qm00128g), 2020-01-01
Supplement: d0qm00128g1.pdf [file d0qm00128g1.pdf]

## Supporting information

### **Design and construction of bi-metal MOF-derived yolk-shell Ni<sub>2</sub>P/ZnP<sub>2</sub> hollow microspheres for efficient electrocatalytic oxygen evolution**

Jinyang Zhang, Xuan Sun, Yang Liu, Linrui Hou, Changzhou Yuan\*

School of Materials Science and Engineering, University of Jinan, Jinan 250022, P. R.

China

\*E-mail: [mse\\_yuancz@ujn.edu.cn](mailto:mse_yuancz@ujn.edu.cn); [ayuancz@163.com](mailto:ayuancz@163.com)

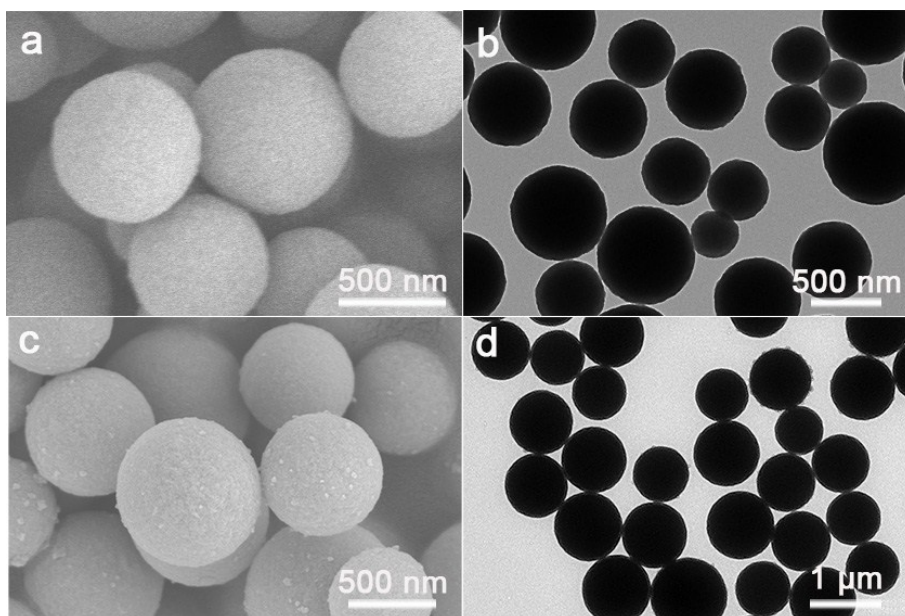

**Fig. S1** FESEM and TEM images of (a, b) the pre-NP and pre-NZP samples.

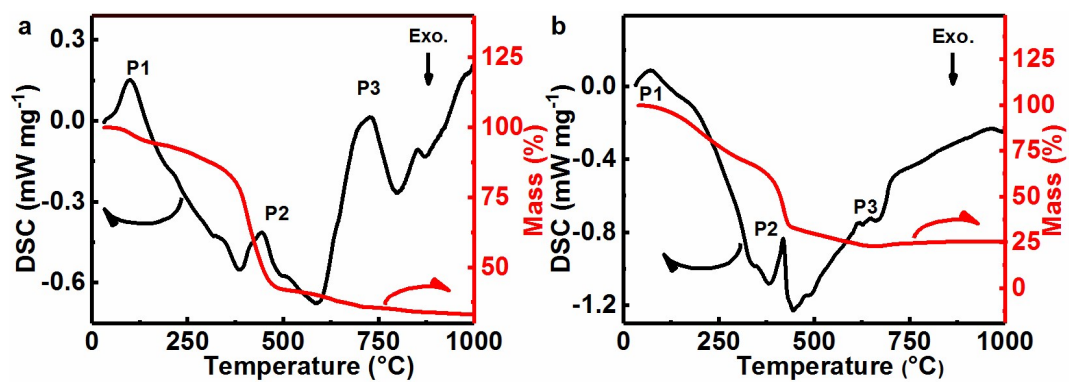

**Fig. S2** DSC and TG curves of (a) pre-NZP and (b) pre-NP samples.

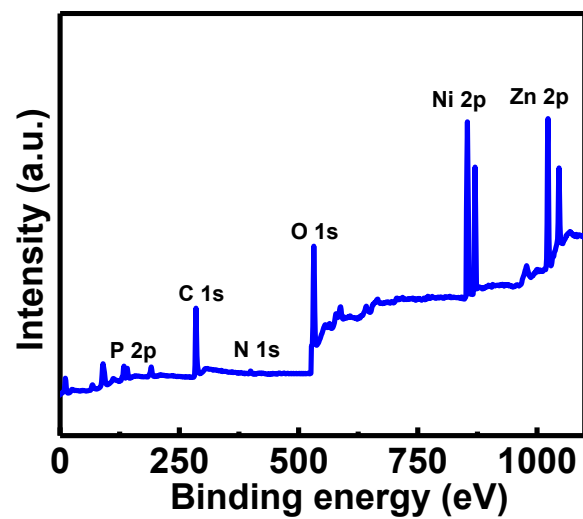

**Fig. S3** XPS Survey spectrum of the yolk-shell NZP HMSs.

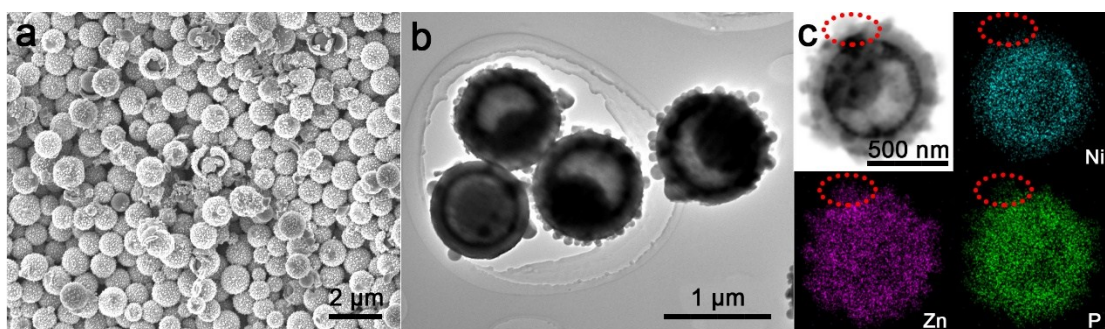

**Fig. S4** (a) FESEM, (b) TEM, (c) STEM and corresponding EDS mapping images of the yolk-shell NZP-5 HMSs.

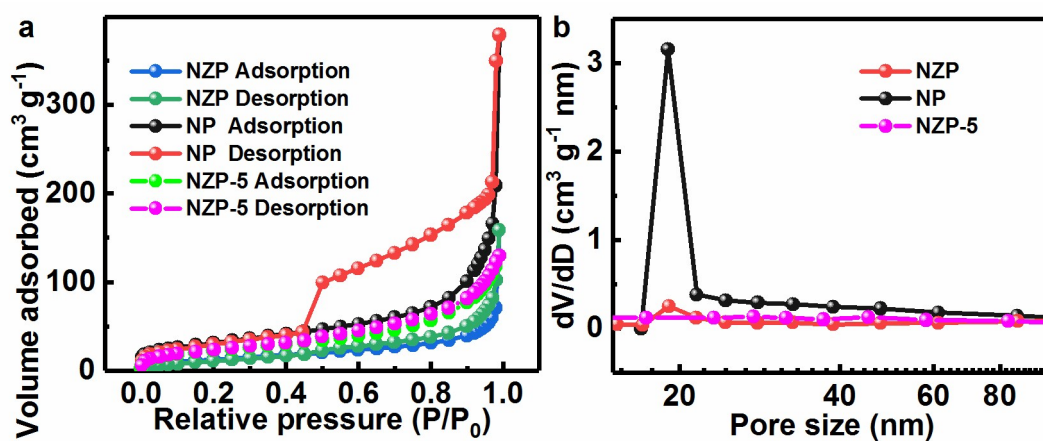

**Fig. S5** (a)  $N_2$  sorption isotherms and (b) PSD plots of the yolk-shell NZP HMSs, solid NP MSs, and yolk-shell NZP-5 HMSs.

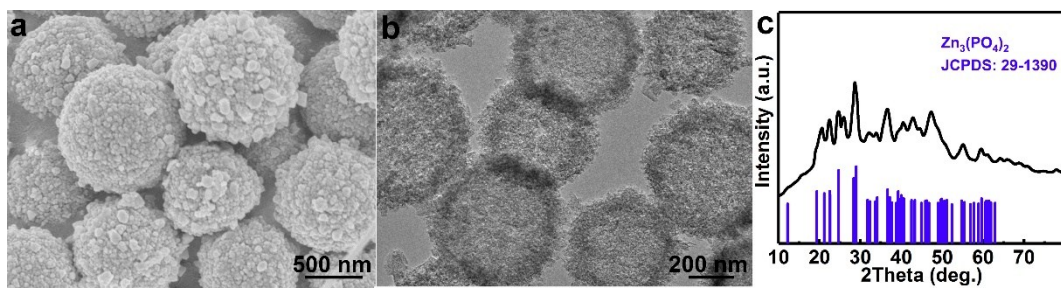

**Fig. S6** (a) FESEM image, (b) TEM image, and (c) XRD pattern of the ZOP HMSs.

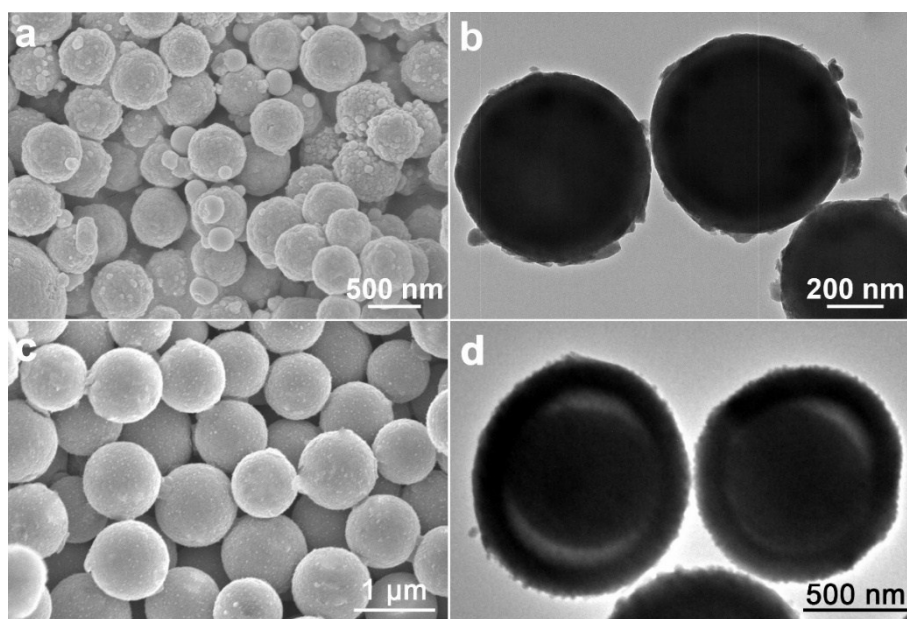

**Fig. S7** (a) FESEM and (b) TEM images of the solid NZP MSs; (c) FESEM and (d) TEM images of the hollow NP HMSs.



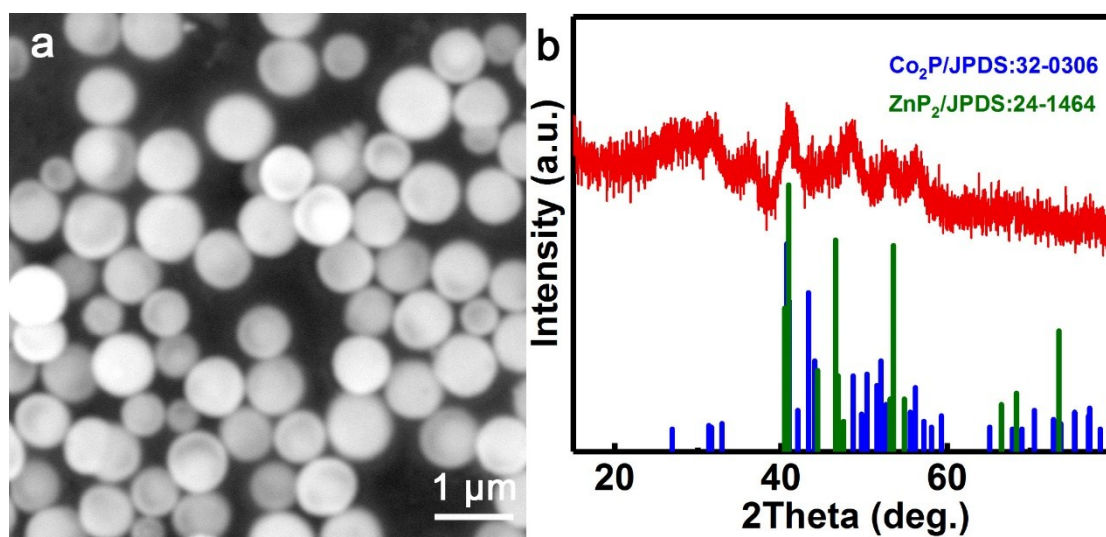

**Fig. S8** (a) FESEM image and (b) XRD pattern of the CZP HMSs.

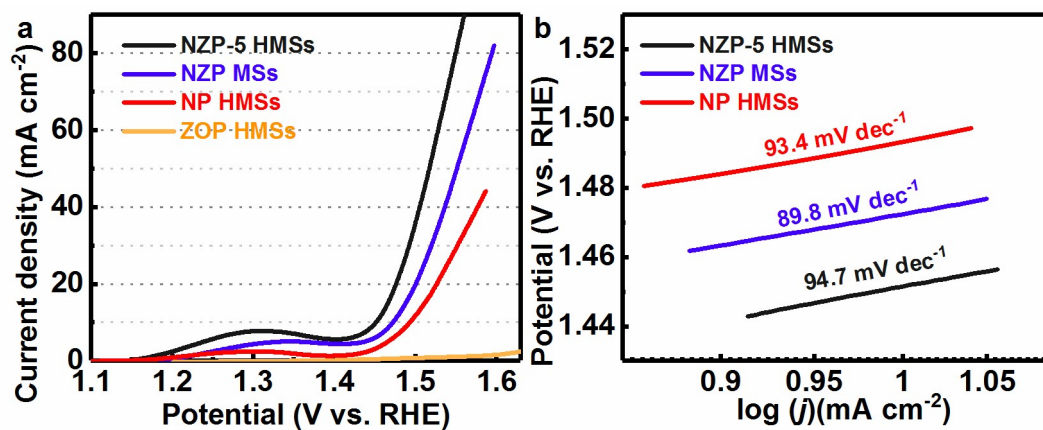

**Fig. S9** (a) LSV curves and (b) Tafel slopes plots of the yolk-shell NYP-5 HMSs, NYP MSs, NP HMSs and ZOP HMSs.

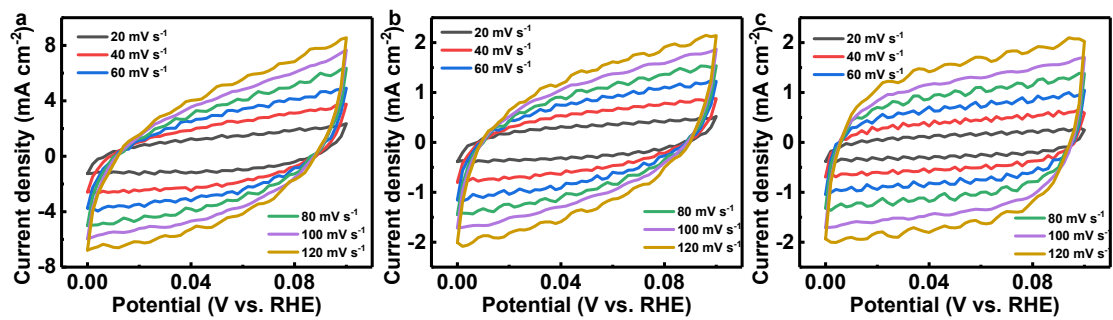

**Fig. S10** CV curves of (a) NZP HMSs, (b) NP MSs and (c) NF at different scan rates from 20 to 100  $\text{mV s}^{-1}$ .

**Table S1** Comparison of the electrocatalytic activity of Ni-P based OER catalysts

| <b>Catalyst</b>                    | <b>Overpotential<br/>(mV)</b> | <b>Tafel Slope<br/>(mV dec<sup>-1</sup>)</b> | <b>Reference</b> |
|------------------------------------|-------------------------------|----------------------------------------------|------------------|
| NZP HMSs                           | 210                           | 55.4                                         | This work        |
| Ni <sub>2</sub> P                  | 240                           | 99.9                                         | 1                |
| Ni <sub>2</sub> P                  | 360                           | 153                                          | 2                |
| Ni <sub>2</sub> P<br>nanoparticles | 290                           | 59                                           | 3                |
| NF-P                               | 350                           | 112.1                                        | 4                |
| Ni <sub>2</sub> P@C                | 340                           | 68                                           | 5                |
| Ni-P                               | 300                           | 64                                           | 6                |
| NiCoP                              | 340                           | 86                                           | 7                |

## References

1. H. Q. Zhou, F. Yu, J. Y. Sun, R. He, S. Chen, C. W. Chu and Z. F. Ren. Highly active catalyst derived from a 3D foam of  $\text{Fe}(\text{PO}_3)_2/\text{Ni}_2\text{P}$  for extremely efficient water oxidation. *Proc. Natl. Acad. Sci. U.S.A.*, 2017, **114**, 5607.
2. Q. Wang, Z. Liu, H. Zhao, H. Huang, H. Jiao and Y. Du. MOF-derived porous  $\text{Ni}_2\text{P}$  nanosheets as novel bifunctional electrocatalysts for the hydrogen and oxygen evolution reactions. *J. Mater. Chem. A*, 2018, **6**, 18720.
3. L. A. Stern, L. Feng, F. Song and X. Hu.  $\text{Ni}_2\text{P}$  as a Janus catalyst for water splitting: the oxygen evolution activity of  $\text{Ni}_2\text{P}$  nanoparticles. *Energy Environ. Sci.*, 2015, **8**, 2347.
4. H. Li, Y. Du, Y. Fu, C. Wu, Z. Xiao, Y. Liu, X. Sun and L. Wang. Self-supported  $\text{Ni}_2\text{P}$  nanotubes coated with FeP nanoparticles electrocatalyst ( $\text{FeP}@/\text{Ni}_2\text{P}/\text{NF}$ ) for oxygen evolution reaction. *Int. J. Hydrogen Energy*, 2020, **45**, 565.
5. M. Wang, M. Lin, J. Li, L. Huang, Z. Zhuang, C. Lin, L. Zhou and L. Mai. Metal-organic framework derived carbon-confined  $\text{Ni}_2\text{P}$  nanocrystals supported on graphene for an efficient oxygen evolution reaction. *Chem. Commun.*, 2017, **53**, 8372.
6. X. Y. Yu, Y. Feng, B. Y. Guan, X. W. D. Lou and U. Paik. Carbon coated porous nickel phosphides nanoplates for highly efficient oxygen evolution reaction. *Energy Environ. Sci.*, 2016, **9**, 1246.
7. C. Wang, J. Jiang, T. Ding, G. Chen, W. Xu and Q. Yang. Monodisperse ternary  $\text{NiCoP}$  nanostructures as a bifunctional electrocatalyst for both hydrogen and oxygen evolution reactions with excellent performance. *Adv. Mater. Interfaces*, 2016, **3**, 1500454.
